# Supplementary material
Source: PubMed Central journal article supplement (PMC5695218)

**Supplemental Figure S1.** European American–Opioid Dependence (EA-OD) linkage results.

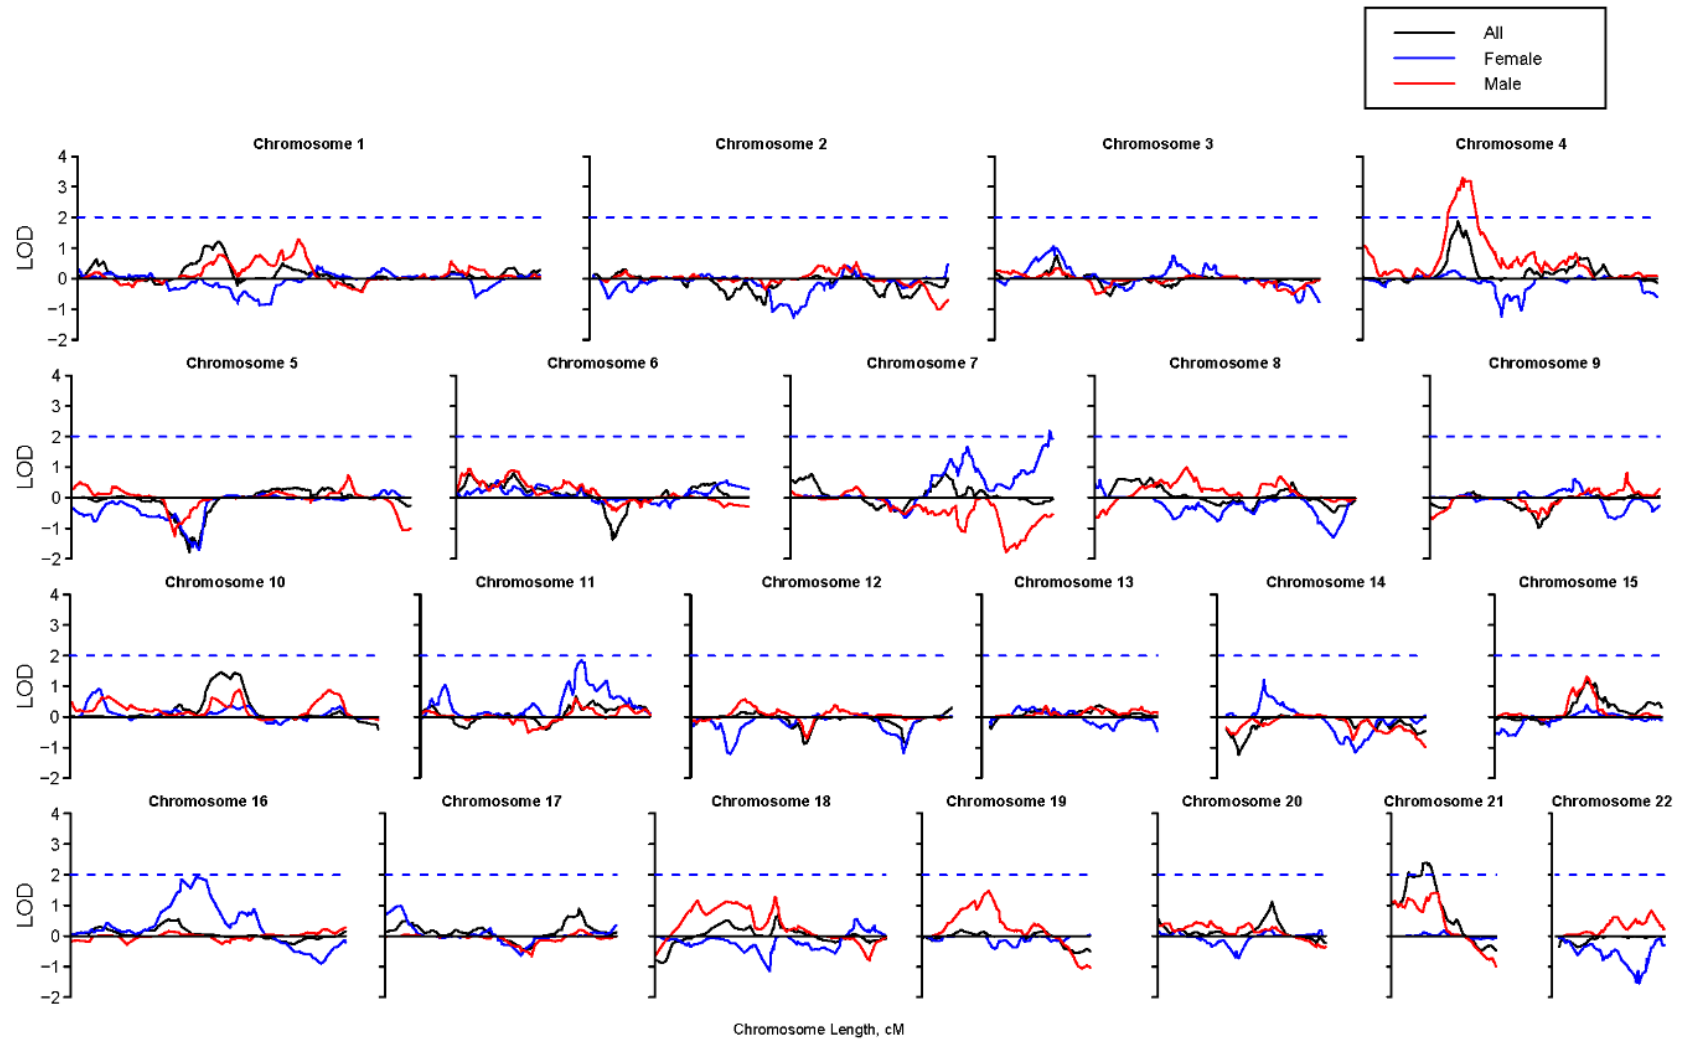

Supplement: NIHMS919674-supplement-5.pdf [file NIHMS919674-supplement-5.pdf]

**Supplemental Figure S2.** African-American–Opioid Dependence (AA-OD) linkage results.

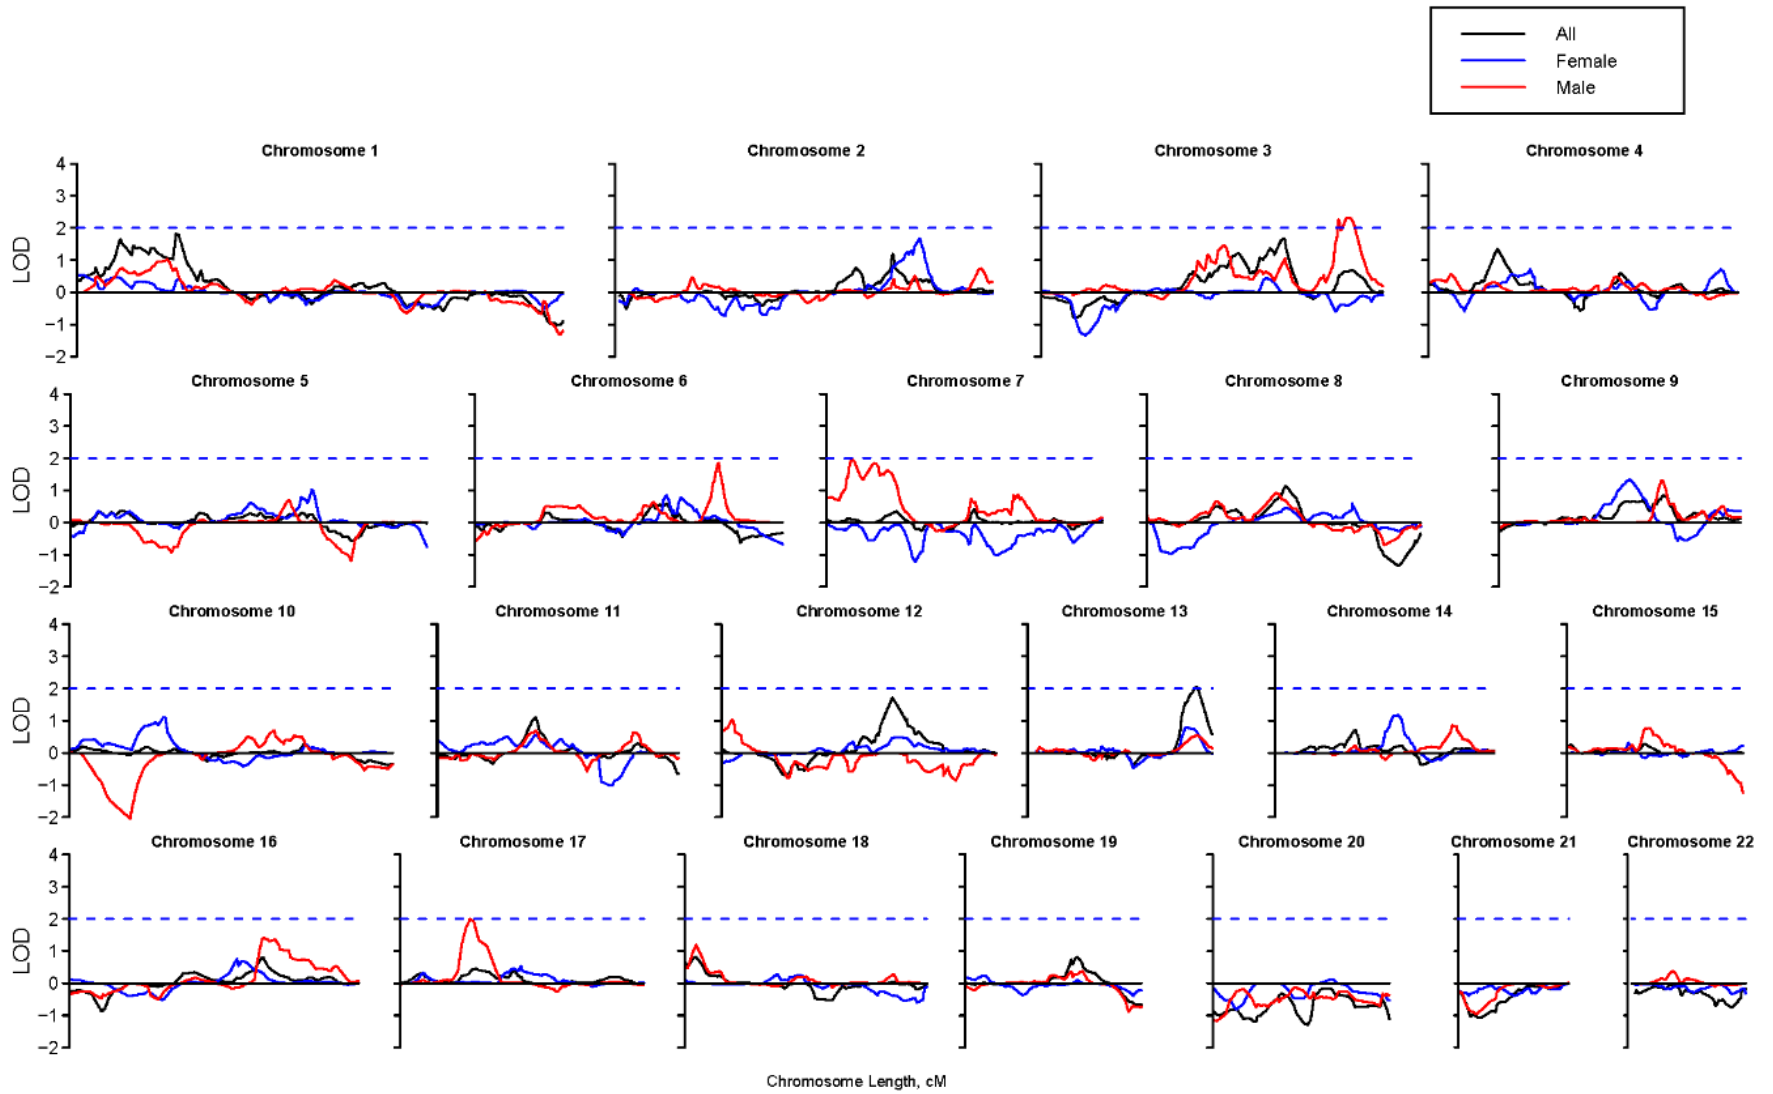

Supplement: NIHMS919674-supplement-6.pdf [file NIHMS919674-supplement-6.pdf]
